# Supplementary material for: Modelling potential habitat for snow leopards (Panthera uncia) in Ladakh, India
Source: PubMed Central journal article supplement (PMC6350993; doi:10.1371/journal.pone.0211509), 2019-01-29
Supplement: pone.0211509.s009.pdf [file pone.0211509.s009.pdf]

| Species        | Deg WGS84 |           | Sample      |
|----------------|-----------|-----------|-------------|
|                | Latitude  | Longitude |             |
| Panthera uncia | 33.5531   | 78.0845   | Camera trap |
| Panthera uncia | 33.5692   | 78.1653   | Camera trap |
| Panthera uncia | 33.5743   | 77.0249   | Camera trap |
| Panthera uncia | 33.5791   | 78.1245   | Camera trap |
| Panthera uncia | 33.5856   | 78.1396   | Camera trap |
| Panthera uncia | 33.6229   | 77.9844   | Camera trap |
| Panthera uncia | 33.6339   | 78.0148   | Camera trap |
| Panthera uncia | 33.6412   | 78.0010   | Camera trap |
| Panthera uncia | 33.6485   | 77.0131   | Camera trap |
| Panthera uncia | 33.6491   | 77.0371   | Camera trap |
| Panthera uncia | 33.6560   | 77.0703   | Camera trap |
| Panthera uncia | 33.6657   | 77.9622   | Camera trap |
| Panthera uncia | 33.6833   | 76.9683   | Camera trap |
| Panthera uncia | 33.6873   | 77.9267   | Camera trap |
| Panthera uncia | 33.6996   | 76.9436   | Camera trap |
| Panthera uncia | 33.7036   | 76.9177   | Camera trap |
| Panthera uncia | 33.7136   | 77.9422   | Camera trap |
| Panthera uncia | 33.7265   | 76.8654   | Camera trap |
| Panthera uncia | 33.7422   | 77.9020   | Camera trap |
| Panthera uncia | 33.7513   | 77.9252   | Camera trap |
| Panthera uncia | 33.7630   | 77.9878   | Camera trap |
| Panthera uncia | 33.7653   | 77.9396   | Camera trap |
| Panthera uncia | 33.7660   | 78.0204   | Camera trap |
| Panthera uncia | 34.2731   | 77.1617   | Camera trap |
| Panthera uncia | 34.2907   | 77.1861   | Camera trap |
| Panthera uncia | 34.3038   | 77.3033   | Camera trap |
| Panthera uncia | 34.3097   | 76.9833   | Camera trap |
| Panthera uncia | 34.3264   | 77.1605   | Camera trap |
| Panthera uncia | 34.3299   | 76.9374   | Camera trap |
| Panthera uncia | 34.3303   | 77.0397   | Camera trap |
| Panthera uncia | 34.3322   | 77.0924   | Camera trap |
| Panthera uncia | 34.3324   | 77.2423   | Camera trap |
| Panthera uncia | 34.3336   | 77.1816   | Camera trap |
| Panthera uncia | 34.3421   | 77.0352   | Camera trap |
| Panthera uncia | 34.3443   | 77.1964   | Camera trap |
| Panthera uncia | 34.3468   | 77.1307   | Camera trap |
| Panthera uncia | 34.3611   | 76.7421   | Camera trap |
| Panthera uncia | 34.3658   | 76.9482   | Camera trap |
| Panthera uncia | 34.3701   | 76.7921   | Camera trap |
| Panthera uncia | 34.3709   | 77.2962   | Camera trap |
| Panthera uncia | 34.3719   | 77.7519   | Camera trap |
| Panthera uncia | 34.3746   | 76.7382   | Camera trap |

|                |         |         |             |
|----------------|---------|---------|-------------|
| Panthera uncia | 34.3778 | 77.0015 | Camera trap |
| Panthera uncia | 34.3789 | 77.0520 | Camera trap |
| Panthera uncia | 34.3837 | 76.9517 | Camera trap |
| Panthera uncia | 34.3906 | 76.7485 | Camera trap |
| Panthera uncia | 33.5810 | 78.0915 | Observation |
| Panthera uncia | 33.6528 | 76.9910 | Observation |
| Panthera uncia | 33.8007 | 77.6214 | Observation |
| Panthera uncia | 34.0210 | 77.5098 | Observation |
| Panthera uncia | 34.0258 | 77.5235 | Observation |
| Panthera uncia | 34.0277 | 77.5220 | Observation |
| Panthera uncia | 34.0289 | 77.5023 | Observation |
| Panthera uncia | 34.0302 | 77.5066 | Observation |
| Panthera uncia | 34.0362 | 77.5183 | Observation |
| Panthera uncia | 34.0371 | 77.5389 | Observation |
| Panthera uncia | 34.0400 | 77.4132 | Observation |
| Panthera uncia | 34.0447 | 77.4990 | Observation |
| Panthera uncia | 34.0455 | 77.5317 | Observation |
| Panthera uncia | 34.0499 | 77.4056 | Observation |
| Panthera uncia | 34.0562 | 77.4192 | Observation |
| Panthera uncia | 34.0613 | 77.4510 | Observation |
| Panthera uncia | 34.0646 | 77.4366 | Observation |
| Panthera uncia | 34.0652 | 77.4164 | Observation |
| Panthera uncia | 34.0761 | 77.4412 | Observation |
| Panthera uncia | 34.0767 | 77.4270 | Observation |
| Panthera uncia | 34.0827 | 77.4117 | Observation |
| Panthera uncia | 34.0829 | 77.3921 | Observation |
| Panthera uncia | 34.0844 | 77.4235 | Observation |
| Panthera uncia | 34.0865 | 77.4059 | Observation |
| Panthera uncia | 34.0989 | 77.4186 | Observation |
| Panthera uncia | 34.1255 | 77.4294 | Observation |
| Panthera uncia | 34.3173 | 77.1188 | Observation |
| Panthera uncia | 34.3198 | 77.1676 | Observation |
| Panthera uncia | 34.3258 | 77.1326 | Observation |
| Panthera uncia | 34.3259 | 77.1479 | Observation |
| Panthera uncia | 34.3269 | 77.1218 | Observation |
| Panthera uncia | 34.3279 | 76.9957 | Observation |
| Panthera uncia | 34.3350 | 77.1285 | Observation |
| Panthera uncia | 34.3417 | 77.1259 | Observation |
| Panthera uncia | 34.3430 | 77.1131 | Observation |
| Panthera uncia | 34.3501 | 77.1453 | Observation |
| Panthera uncia | 34.7367 | 77.9889 | Observation |

---
