# Supplementary material for: Modelling potential habitat for snow leopards (Panthera uncia) in Ladakh, India
Source: PubMed Central journal article supplement (PMC6350993; doi:10.1371/journal.pone.0211509), 2019-01-29
Supplement: pone.0211509.s010.pdf [file pone.0211509.s010.pdf]

| Species        | Deg WGS84 |           | Sample      |
|----------------|-----------|-----------|-------------|
|                | Latitude  | Longitude |             |
| Capra sibirica | 33.7015   | 76.9405   | Camera trap |
| Capra sibirica | 33.7265   | 76.8654   | Camera trap |
| Capra sibirica | 34.2695   | 77.1859   | Camera trap |
| Capra sibirica | 34.2861   | 77.1693   | Camera trap |
| Capra sibirica | 34.3030   | 77.1497   | Camera trap |
| Capra sibirica | 34.3097   | 76.9833   | Camera trap |
| Capra sibirica | 34.3314   | 76.8841   | Camera trap |
| Capra sibirica | 34.3339   | 77.1022   | Camera trap |
| Capra sibirica | 34.3443   | 77.1964   | Camera trap |
| Capra sibirica | 34.3709   | 77.2962   | Camera trap |
| Capra sibirica | 34.3729   | 77.2011   | Camera trap |
| Capra sibirica | 33.0058   | 77.1728   | Observation |
| Capra sibirica | 33.1143   | 77.1749   | Observation |
| Capra sibirica | 33.1656   | 77.0703   | Observation |
| Capra sibirica | 33.1656   | 77.1749   | Observation |
| Capra sibirica | 33.1656   | 77.2322   | Observation |
| Capra sibirica | 33.4339   | 77.2322   | Observation |
| Capra sibirica | 33.5937   | 76.3446   | Observation |
| Capra sibirica | 34.1023   | 76.4553   | Observation |
| Capra sibirica | 34.1023   | 77.2322   | Observation |
| Capra sibirica | 34.1138   | 76.1880   | Observation |
| Capra sibirica | 34.1515   | 76.4040   | Observation |
| Capra sibirica | 34.1617   | 77.0724   | Observation |
| Capra sibirica | 34.1649   | 76.8130   | Observation |
| Capra sibirica | 34.2159   | 76.2946   | Observation |
| Capra sibirica | 34.2644   | 76.3941   | Observation |
| Capra sibirica | 34.2724   | 76.4553   | Observation |
| Capra sibirica | 34.3154   | 78.1649   | Observation |
| Capra sibirica | 34.3246   | 76.4033   | Observation |
| Capra sibirica | 34.3639   | 76.8130   | Observation |
| Capra sibirica | 34.3750   | 76.1257   | Observation |
| Capra sibirica | 34.3809   | 78.1157   | Observation |
| Capra sibirica | 34.3890   | 76.5617   | Observation |
| Capra sibirica | 34.4301   | 78.0051   | Observation |
| Capra sibirica | 34.4752   | 78.1034   | Observation |
| Capra sibirica | 34.4855   | 77.3347   | Observation |
| Capra sibirica | 34.4916   | 77.2813   | Observation |
| Capra sibirica | 34.5346   | 76.5617   | Observation |
| Capra sibirica | 34.5346   | 77.0724   | Observation |
| Capra sibirica | 34.5360   | 76.1257   | Observation |
| Capra sibirica | 34.5817   | 76.5126   | Observation |
| Capra sibirica | 35.0001   | 77.2014   | Observation |

|                 |         |         |             |
|-----------------|---------|---------|-------------|
| Capra sibirica  | 35.0001 | 77.1809 | Observation |
| Capra sibirica  | 35.0453 | 77.3347 | Observation |
| Capra sibirica  | 35.1436 | 77.3407 | Observation |
| Capra sibirica  | 35.1538 | 77.2916 | Observation |
| Capra sibirica  | 35.2051 | 77.2322 | Observation |
| Capra sibirica  | 35.3034 | 77.1809 | Observation |
| Pseudois nayaur | 34.2282 | 77.0149 | Observation |
| Pseudois nayaur | 33.0055 | 78.4929 | Observation |
| Pseudois nayaur | 33.0055 | 78.3842 | Observation |
| Pseudois nayaur | 33.0058 | 77.5005 | Observation |
| Pseudois nayaur | 33.0540 | 78.4327 | Observation |
| Pseudois nayaur | 33.0549 | 78.1649 | Observation |
| Pseudois nayaur | 33.0549 | 77.5005 | Observation |
| Pseudois nayaur | 33.1204 | 77.3859 | Observation |
| Pseudois nayaur | 33.1656 | 78.1649 | Observation |
| Pseudois nayaur | 33.1718 | 78.3751 | Observation |
| Pseudois nayaur | 33.2137 | 78.5531 | Observation |
| Pseudois nayaur | 33.2203 | 78.3751 | Observation |
| Pseudois nayaur | 33.2250 | 77.5559 | Observation |
| Pseudois nayaur | 33.2713 | 78.2821 | Observation |
| Pseudois nayaur | 33.2741 | 77.3347 | Observation |
| Pseudois nayaur | 33.3848 | 77.3347 | Observation |
| Pseudois nayaur | 33.3848 | 77.4453 | Observation |
| Pseudois nayaur | 33.3848 | 77.5457 | Observation |
| Pseudois nayaur | 33.3852 | 78.2821 | Observation |
| Pseudois nayaur | 33.4339 | 78.3718 | Observation |
| Pseudois nayaur | 33.4428 | 78.2704 | Observation |
| Pseudois nayaur | 33.5449 | 78.1709 | Observation |
| Pseudois nayaur | 33.5934 | 78.2245 | Observation |
| Pseudois nayaur | 34.0040 | 77.5005 | Observation |
| Pseudois nayaur | 34.0532 | 77.3407 | Observation |
| Pseudois nayaur | 34.1256 | 78.2704 | Observation |
| Pseudois nayaur | 34.1557 | 78.0556 | Observation |
| Pseudois nayaur | 34.1617 | 77.4351 | Observation |
| Pseudois nayaur | 34.1617 | 77.5005 | Observation |
| Pseudois nayaur | 34.1638 | 78.3329 | Observation |
| Pseudois nayaur | 34.2724 | 77.3407 | Observation |
| Pseudois nayaur | 34.2724 | 78.4435 | Observation |
| Pseudois nayaur | 35.0001 | 78.0051 | Observation |
| Pseudois nayaur | 35.1457 | 77.5005 | Observation |
| Pseudois nayaur | 35.2051 | 77.4453 | Observation |
| Pseudois nayaur | 35.2051 | 77.5457 | Observation |

---
