# Supplementary material for: Modelling potential habitat for snow leopards (Panthera uncia) in Ladakh, India
Source: PubMed Central journal article supplement (PMC6350993; doi:10.1371/journal.pone.0211509), 2019-01-29
Supplement: pone.0211509.s011.pdf [file pone.0211509.s011.pdf]

| Deg WGS84         |          |           |        |             |          |                     |
|-------------------|----------|-----------|--------|-------------|----------|---------------------|
| Village           | Latitude | Longitude | Corral | Depredation | Homestay | Habitat Suitability |
| Abran             | 33.6974  | 76.5647   |        |             |          | 1                   |
| Achambur          | 34.0901  | 75.9376   |        |             |          | 3                   |
| Akchamal          | 34.5557  | 76.1624   |        |             |          | 2                   |
| Akshow            | 33.7167  | 76.5170   |        |             |          | 1                   |
| Alchi             | 34.2231  | 77.1730   |        |             |          | 2                   |
| Amdi-Tangyar      | 34.2466  | 77.8584   |        |             |          | 3                   |
| Ang               | 34.3328  | 77.0218   |        | 2           | 8        | 2                   |
| Ang-Temisgam      | 34.3338  | 77.0215   | 1      |             |          | 2                   |
| Anmu              | 33.2473  | 77.0738   |        |             | 2        | 3                   |
| Apati             | 34.5695  | 76.2117   |        |             |          | 2                   |
| Ating             | 33.5235  | 76.7525   |        |             |          | 1                   |
| Barchey           | 34.5745  | 76.2320   |        |             |          | 2                   |
| Barsoo            | 34.5445  | 76.1363   |        |             |          | 1                   |
| Barto             | 34.1807  | 76.1532   |        |             |          | 2                   |
| Basgo             | 34.2122  | 77.2826   |        |             |          | 3                   |
| Basgo-tunglung    | 34.2387  | 77.2822   |        | 1           |          | 3                   |
| Batambis          | 34.3729  | 76.1835   |        |             |          | 2                   |
| Biambiat          | 34.4320  | 75.8178   |        |             |          | 1                   |
| Bodhkharbu        | 34.2553  | 76.6351   |        |             |          | 2                   |
| Bogdang           | 34.8035  | 77.0421   |        |             |          | 3                   |
| Chah              | 33.2408  | 77.1595   | 19     |             | 5        | 3                   |
| Chamshen Charasha | 34.6774  | 77.5514   |        |             |          | 1                   |
| Changa            | 33.9360  | 77.7241   |        |             |          | 2                   |
| Changlung         | 34.9301  | 77.4726   |        |             |          | 2                   |
| Chemrey           | 33.9500  | 77.7807   |        |             |          | 2                   |
| Chiktan           | 34.4669  | 76.5120   |        |             |          | 2                   |
| Chiling Sumda     | 34.0388  | 77.2031   |        |             | 4        | 2                   |
| Choglamsar        | 34.0995  | 77.5965   |        |             |          | 1                   |
| Chokial           | 34.4216  | 75.9061   |        |             |          | 3                   |
| Choskar           | 34.4035  | 76.1423   |        |             |          | 1                   |
| Chosker Suru      | 34.0983  | 76.0079   |        |             |          | 3                   |
| Chuchot Gongma    | 34.0367  | 77.6518   |        |             |          | 1                   |
| Chuchot Shama     | 34.0607  | 77.6225   |        |             |          | 1                   |
| Chuchot Yokma     | 34.0805  | 77.5996   |        |             |          | 1                   |
| Chulichan         | 34.4299  | 76.5221   |        |             |          | 3                   |
| Chuliskambo       | 34.5308  | 76.1010   |        |             |          | 3                   |
| Chulungkha        | 34.8175  | 76.9563   |        |             |          | 1                   |
| Chumathang        | 33.3600  | 78.3405   |        |             |          | 1                   |
| Chumur            | 32.6667  | 78.5928   |        |             |          | 2                   |
| Chushul           | 33.6021  | 78.6526   |        |             |          | 1                   |
| Dah               | 34.6047  | 76.5089   |        |             |          | 3                   |
| Darkiat           | 34.4458  | 76.2801   |        |             |          | 3                   |
| Debring           | 33.4103  | 77.8863   |        |             |          | 1                   |
| Derchiks          | 34.5505  | 76.4365   |        |             |          | 3                   |
| Dethang           | 33.1879  | 77.1615   | 1      |             |          | 3                   |
| Diger             | 34.2941  | 77.8062   | 1      |             |          | 3                   |
| Disket            | 34.5496  | 77.5517   |        |             |          | 1                   |
| Domkhar           | 34.3916  | 76.7738   |        |             |          | 2                   |

|                          |         |         |   |   |   |   |
|--------------------------|---------|---------|---|---|---|---|
| Dorzong                  | 33.2916 | 77.0168 | 2 |   |   | 3 |
| Dungti                   | 33.1923 | 78.9581 |   |   |   | 1 |
| Durbuk                   | 34.0961 | 78.1222 |   |   |   | 3 |
| Echer                    | 33.3056 | 76.9974 | 3 |   | 4 | 3 |
| Farona                   | 34.3416 | 75.9758 |   |   |   | 3 |
| Garashisa                | 33.2763 | 77.0316 | 1 |   |   | 3 |
| Garkon                   | 34.5647 | 76.4817 |   |   |   | 3 |
| Gera-Mangu               | 34.2457 | 77.1640 |   |   |   | 1 |
| Gia                      | 33.6493 | 77.7393 |   |   |   | 3 |
| Gindial                  | 34.4142 | 75.8570 |   |   |   | 3 |
| Gogra                    | 34.2987 | 78.9459 |   |   |   | 2 |
| Goshan                   | 34.4061 | 75.7990 |   |   |   | 3 |
| Gundmangalpur            | 34.3528 | 76.0610 |   |   |   | 1 |
| Gyaling                  | 34.1872 | 75.9482 |   |   |   | 3 |
| Hagnis                   | 34.5139 | 76.4946 |   |   |   | 3 |
| Hamiling                 | 33.6684 | 76.6254 |   |   |   | 1 |
| Hankar-Doltokling-Umlung | 33.7793 | 77.5137 | 5 |   |   | 3 |
| Hanley                   | 32.7900 | 78.9997 |   |   |   | 2 |
| Hanu                     | 34.5901 | 76.6221 |   |   |   | 2 |
| Hanupata                 | 34.1608 | 76.8415 | 1 |   |   | 3 |
| Hardas                   | 34.6002 | 76.1055 |   |   |   | 2 |
| Haripora                 | 34.4194 | 75.8279 |   |   |   | 3 |
| Hemis                    | 33.9118 | 77.7059 |   |   |   | 3 |
| Hemisshukpachan          | 34.3162 | 77.0773 | 1 | 6 | 4 | 2 |
| Hemya                    | 33.6543 | 78.0083 |   |   | 4 | 3 |
| Heniskot                 | 34.3074 | 76.6203 |   |   |   | 2 |
| Hepti                    | 34.2613 | 77.0089 |   |   |   | 3 |
| Holiyal                  | 34.4378 | 75.7630 |   |   |   | 1 |
| Hunder                   | 34.5890 | 77.4717 |   |   |   | 1 |
| Hunder Dok               | 34.4929 | 77.4325 |   |   |   | 3 |
| Hundri                   | 34.6705 | 77.3883 |   |   |   | 1 |
| Icher                    | 33.1934 | 77.1802 |   |   |   | 2 |
| Igoo                     | 33.9037 | 77.8105 |   |   |   | 2 |
| Itchoo                   | 34.1326 | 76.2903 |   |   |   | 1 |
| Jusgund                  | 34.3827 | 75.9647 |   |   |   | 3 |
| Kaksar                   | 34.5193 | 75.9732 |   |   |   | 3 |
| Kanji                    | 34.2324 | 76.6055 |   |   |   | 3 |
| Kanor                    | 34.3692 | 76.1093 |   |   |   | 3 |
| Karamba                  | 34.3842 | 76.2501 |   |   |   | 2 |
| KarcheY Khar             | 34.2259 | 76.0028 |   |   |   | 3 |
| Kargaim                  | 33.8791 | 78.2842 |   |   |   | 2 |
| Kargi                    | 34.1317 | 75.9395 |   |   |   | 3 |
| Kargyak                  | 33.0625 | 77.2247 |   |   |   | 2 |
| Karit                    | 34.4658 | 76.3898 |   |   |   | 3 |
| Karkit                   | 34.5426 | 76.0514 |   |   |   | 2 |
| Karpo Khar               | 34.2531 | 75.9681 |   |   |   | 2 |
| Karsha                   | 33.5317 | 76.9047 |   |   | 6 | 3 |
| Karshah                  | 33.4961 | 77.0017 |   |   |   | 2 |
| Kaya                     | 33.9877 | 77.2511 |   |   | 2 | 3 |
| Keray                    | 33.4776 | 78.1259 |   |   |   | 3 |

|                      |         |         |    |   |   |
|----------------------|---------|---------|----|---|---|
| Kesar                | 33.4059 | 78.2384 |    | 4 | 1 |
| Khachey              | 34.3397 | 76.3136 |    |   | 3 |
| Khalsar              | 34.4909 | 77.7039 |    |   | 2 |
| Khaltsi              | 34.3221 | 76.8812 |    |   | 3 |
| Khandi               | 34.2385 | 76.0718 |    |   | 2 |
| Kharbu               | 34.5425 | 75.9899 |    |   | 2 |
| Khardong             | 34.4012 | 77.6575 |    |   | 2 |
| Kharnak              | 33.2575 | 77.7030 |    |   | 1 |
| Kharoo               | 33.9246 | 77.7351 |    |   | 3 |
| Khatpoo              | 33.6717 | 77.9763 | 12 |   | 3 |
| Khema                | 34.2456 | 77.8081 |    |   | 1 |
| Khema Khungru        | 34.2838 | 77.8284 |    |   | 3 |
| Khemi                | 34.9442 | 77.4249 |    |   | 2 |
| Khows                | 34.1507 | 75.9712 |    |   | 3 |
| Khuldo               | 32.7703 | 78.9844 |    |   | 1 |
| Kochik               | 34.0387 | 75.9536 |    |   | 3 |
| Korzok               | 32.9661 | 78.2630 |    |   | 2 |
| Kubet                | 34.8183 | 77.4964 |    |   | 2 |
| Kuksho               | 34.3783 | 76.5866 |    |   | 2 |
| Kukste               | 34.4543 | 76.3462 |    |   | 2 |
| Kumdok               | 33.5207 | 78.1886 |    |   | 2 |
| Kumic                | 33.4969 | 76.9533 | 1  |   | 2 |
| Kungiam              | 33.1994 | 78.6448 |    |   | 1 |
| Kuru Lungnak         | 33.1613 | 77.1849 | 1  |   | 3 |
| Kuyul                | 32.8853 | 79.1997 |    |   | 2 |
| Kyalbok              | 33.2371 | 77.1097 | 1  |   | 3 |
| Lakjung              | 34.5856 | 77.6195 |    |   | 1 |
| Lalung               | 34.5845 | 76.2957 |    |   | 2 |
| Lamayuru             | 34.2835 | 76.7729 | 1  |   | 3 |
| Lamsusando           | 34.4903 | 76.4223 |    |   | 3 |
| Langkor              | 33.9187 | 77.8533 |    |   | 3 |
| Lankarchey           | 34.3208 | 75.9588 |    |   | 1 |
| Largyab              | 34.6190 | 77.1240 |    |   | 3 |
| Leh Dho              | 34.4453 | 76.6837 |    |   | 2 |
| Likir                | 34.2934 | 77.2150 |    | 5 | 3 |
| Liktse               | 33.7271 | 77.9547 |    |   | 3 |
| Lingshet             | 33.9048 | 76.8221 |    |   | 3 |
| Lochum               | 34.4109 | 76.3255 |    |   | 3 |
| Lukung               | 33.9992 | 78.4077 |    |   | 2 |
| Lungmi Rezing        | 33.4774 | 76.9731 |    |   | 2 |
| Lyoma                | 33.1702 | 78.8234 |    |   | 1 |
| Mahe                 | 33.2615 | 78.4983 |    |   | 3 |
| Malbekh              | 34.3231 | 76.3981 |    |   | 2 |
| Mangue               | 34.2323 | 77.0487 |    |   | 3 |
| Man-Pangong          | 33.8559 | 78.5275 |    |   | 1 |
| Markha               | 33.8868 | 77.4234 | 1  |   | 3 |
| Markha-Hankar-Umlung | 33.7879 | 77.5952 |    |   | 1 |
| Martselang           | 33.9065 | 77.7379 |    |   | 1 |
| Matayan              | 34.3585 | 75.6256 |    |   | 3 |
| Matho                | 33.9958 | 77.6346 | 16 |   | 1 |

|                   |         |         |   |   |   |
|-------------------|---------|---------|---|---|---|
| Minji             | 34.4450 | 76.0946 |   | 3 |   |
| Miru              | 33.7404 | 77.7575 |   | 3 |   |
| Mudh              | 33.2021 | 78.6956 |   | 1 |   |
| Murad Bagh        | 34.4258 | 75.8030 |   | 3 |   |
| Murgo             | 35.0410 | 77.9375 |   | 2 |   |
| Mushku            | 34.4378 | 75.6659 |   | 2 |   |
| Nagmakusar        | 34.2881 | 76.0134 |   | 2 |   |
| Namsuru           | 34.1142 | 76.0226 |   | 1 |   |
| Nang              | 34.0452 | 77.7421 |   | 3 |   |
| Ney               | 34.2788 | 77.3001 |   | 2 |   |
| Nimoo             | 34.1932 | 77.3419 |   | 2 |   |
| Nunamchey         | 34.4319 | 76.2881 |   | 3 |   |
| Nurla             | 34.3024 | 76.9833 |   | 3 |   |
| Nyoma             | 33.2042 | 78.6488 |   | 1 |   |
| Nyrags            | 33.8765 | 76.9269 | 6 | 3 |   |
| Padam             | 33.4041 | 76.9072 |   | 3 |   |
| Panamik           | 34.7961 | 77.5263 |   | 1 |   |
| Pandras           | 34.4115 | 75.6332 |   | 3 |   |
| Pang              | 33.1292 | 77.7826 |   | 2 |   |
| Pangkumik         | 33.5012 | 76.9586 | 1 | 2 |   |
| Panikhar          | 34.1133 | 75.9492 |   | 3 |   |
| Parkachik         | 34.0528 | 76.0017 |   | 1 |   |
| Partapur          | 34.6100 | 77.4548 |   | 1 |   |
| Phey              | 34.1317 | 77.4678 | 1 | 2 |   |
| Phobrang          | 34.0540 | 78.4420 |   | 1 |   |
| Phoo              | 34.3821 | 76.2313 |   | 3 |   |
| Photoksar         | 34.0709 | 76.8294 | 4 | 3 |   |
| Phuktal           | 33.2689 | 77.1807 |   | 1 | 3 |
| Phuktse           | 33.8209 | 77.9099 |   | 3 |   |
| Phultuks          | 34.5604 | 76.0921 |   | 3 |   |
| Phyang            | 34.1863 | 77.4895 |   | 2 |   |
| Pibiting          | 33.4803 | 76.8912 |   | 1 |   |
| Pidmo             | 33.6903 | 76.9328 | 1 | 5 | 2 |
| Pipcha            | 33.3455 | 76.9920 | 1 |   | 1 |
| Pishu             | 33.6328 | 76.9836 | 1 | 5 | 2 |
| Poyan             | 34.5624 | 76.1327 |   | 1 |   |
| Pranti            | 34.1170 | 75.9405 |   | 3 |   |
| Puga              | 33.2284 | 78.2992 |   | 1 |   |
| Punguk            | 32.7581 | 78.8935 |   | 1 |   |
| Purtikchy         | 34.1706 | 75.9251 |   | 3 |   |
| Push Kum          | 34.5116 | 76.1929 |   | 2 |   |
| Ralakung          | 33.7511 | 76.6955 | 1 | 2 |   |
| Rambirpur (Drass) | 34.4141 | 75.7395 |   | 3 |   |
| Ranbirpur         | 34.0284 | 77.6798 |   | 1 |   |
| Rangdum           | 34.0369 | 76.3741 |   | 1 |   |
| Rantaq Shah       | 33.5628 | 76.7539 |   | 2 |   |
| Raru              | 33.3051 | 76.9992 |   | 6 | 3 |
| Remala Skyagam    | 33.6359 | 76.6734 |   | 2 |   |
| Rhongo            | 33.1150 | 78.8356 |   | 1 |   |
| Rinam             | 33.5411 | 76.9590 | 1 | 2 |   |

|                 |         |         |   |   |   |   |
|-----------------|---------|---------|---|---|---|---|
| Rumbak          | 34.0545 | 77.4318 | 1 |   | 9 | 3 |
| Ruru Moony      | 33.2861 | 76.9854 |   |   |   | 2 |
| Saboo           | 34.1284 | 77.6272 | 8 |   |   | 2 |
| Safi            | 34.2966 | 76.2493 |   |   |   | 2 |
| Sakti           | 33.9928 | 77.8148 | 1 |   |   | 1 |
| Salapi Ruruk    | 33.4920 | 76.8612 |   |   |   | 1 |
| Saleskot        | 34.3669 | 76.0044 |   |   |   | 3 |
| Samad-Rockchen  | 33.2977 | 77.9066 |   |   |   | 1 |
| Samrah          | 34.4110 | 76.5235 |   |   |   | 1 |
| Sangra          | 34.2238 | 75.9739 |   |   |   | 1 |
| Sangtha         | 33.3173 | 77.7043 |   |   |   | 1 |
| Sanjak          | 34.5780 | 76.5271 |   |   |   | 3 |
| Saspochey       | 34.3119 | 77.1591 | 6 | 8 | 8 | 3 |
| Saspol          | 34.2461 | 77.1639 |   |   |   | 1 |
| Satho Kargyam   | 33.9072 | 78.2657 |   |   |   | 1 |
| Selapigai Pak   | 33.4308 | 76.8758 |   |   |   | 3 |
| Seni            | 33.4458 | 76.8264 |   |   |   | 1 |
| Shachukul       | 33.9866 | 78.1066 |   |   |   | 2 |
| Shadey          | 33.3778 | 77.2527 | 1 |   |   | 3 |
| Shakar          | 34.4147 | 76.4428 |   |   |   | 3 |
| Shan Shaday     | 33.4054 | 77.2398 |   |   |   | 2 |
| Shang           | 33.8542 | 77.7076 |   |   |   | 3 |
| Shara           | 33.7930 | 77.8976 |   |   |   | 2 |
| Shargol         | 34.3431 | 76.3709 |   |   |   | 2 |
| Sharnos         | 33.7730 | 77.8852 |   |   |   | 2 |
| Shela Phu       | 33.4349 | 76.9348 |   | 7 |   | 3 |
| Shergandi       | 34.1724 | 76.1823 |   |   |   | 2 |
| Shey            | 34.0695 | 77.6335 |   |   |   | 1 |
| Shilikchey      | 34.5742 | 76.1245 |   |   |   | 3 |
| Shilingskit     | 33.5596 | 77.0074 | 1 |   |   | 2 |
| Shilla          | 33.4304 | 76.8963 | 1 |   |   | 2 |
| Shimsha         | 34.4548 | 76.0314 |   |   |   | 3 |
| Shingo          | 34.0284 | 77.3061 |   |   | 1 | 3 |
| Shyok           | 34.1794 | 78.1413 |   |   |   | 3 |
| Silmo           | 34.6291 | 76.3239 |   |   |   | 3 |
| Skambo          | 34.3931 | 76.2631 |   |   |   | 3 |
| Skampuk         | 34.6246 | 77.4342 |   |   |   | 1 |
| Skindiang       | 34.3697 | 76.9021 |   |   | 5 | 3 |
| Skitmang        | 33.3833 | 78.2722 |   |   |   | 2 |
| Sku             | 33.9792 | 77.2621 |   |   | 1 | 2 |
| Sku-Kaya-Shingo | 34.0267 | 77.3397 | 2 |   |   | 1 |
| Skurbuchan      | 34.4343 | 76.7103 |   |   |   | 3 |
| Skuru           | 34.6714 | 77.2934 |   |   |   | 1 |
| Stakmo          | 34.1109 | 77.6959 |   |   |   | 3 |
| Stakna          | 34.0042 | 77.6808 |   |   |   | 1 |
| Stakpa          | 34.3044 | 75.9238 |   |   |   | 3 |
| Staktse         | 34.3075 | 76.6030 |   |   |   | 3 |
| Stok            | 34.0634 | 77.5483 |   |   |   | 2 |
| Stongdey        | 33.5253 | 76.9796 | 1 |   |   | 2 |
| Sumdo           | 33.2345 | 78.3661 |   |   |   | 1 |

|                      |         |         |   |    |   |   |
|----------------------|---------|---------|---|----|---|---|
| Sumoor               | 34.6182 | 77.6185 |   |    |   | 1 |
| Tacha                | 34.4270 | 76.3614 |   |    |   | 2 |
| Tai Suru             | 34.1180 | 75.9467 |   |    | 2 | 3 |
| Takmachik            | 34.3825 | 76.7642 |   |    |   | 2 |
| Takshi               | 34.8888 | 76.8026 |   |    |   | 2 |
| Tambis               | 34.4183 | 76.0551 |   |    |   | 1 |
| Tampo                | 33.6425 | 76.9818 | 2 |    |   | 1 |
| Tangday Kumi         | 34.3584 | 76.2636 |   |    |   | 3 |
| Tangol               | 34.0262 | 75.9130 |   |    |   | 1 |
| Tangse Kongma        | 33.1370 | 77.2140 |   | 1  |   | 2 |
| Tangtsey             | 34.0330 | 78.1670 |   |    |   | 1 |
| Tangyar              | 34.2541 | 77.8741 | 1 |    |   | 3 |
| Tangze Lungnak       | 33.1439 | 77.2098 | 1 |    |   | 2 |
| Tangzey              | 33.1372 | 77.2134 | 1 | 5  |   | 2 |
| Tar                  | 34.2794 | 76.9669 |   |    |   | 3 |
| Tarchit              | 33.7034 | 77.9485 |   |    |   | 3 |
| Taru                 | 34.2050 | 77.4315 |   |    |   | 2 |
| Tarutse              | 34.2743 | 77.1961 |   | 1  | 4 | 2 |
| Taya Charchar        | 34.3473 | 76.9726 |   | 1  |   | 2 |
| Techa Khasar         | 33.4792 | 76.8693 |   |    |   | 1 |
| Temisgam             | 34.3241 | 76.9882 |   |    | 6 | 3 |
| Terchey              | 34.6615 | 77.3291 |   |    |   | 1 |
| Teri                 | 33.5638 | 78.0368 |   |    |   | 2 |
| Testa                | 33.1154 | 77.2008 | 1 |    |   | 2 |
| Thakhan Tungri       | 33.5234 | 76.7974 | 1 |    |   | 2 |
| Thang Dumbur         | 34.3071 | 76.0242 |   |    |   | 1 |
| Thanga Chathang      | 34.9259 | 76.7971 |   |    |   | 2 |
| Thangra              | 33.2142 | 78.8807 |   |    |   | 3 |
| Thangso              | 33.1276 | 77.2139 |   | 7  |   | 3 |
| Thasgam              | 34.4766 | 75.9343 |   |    |   | 2 |
| Thasgam Thaine       | 34.3316 | 76.1635 |   |    |   | 3 |
| Thiksey              | 34.0444 | 77.6695 |   |    |   | 1 |
| Thrangos             | 34.3860 | 75.8752 |   |    |   | 1 |
| Thukje               | 33.3600 | 78.0219 |   |    |   | 1 |
| Thuls Pursa          | 34.0851 | 75.9772 |   |    |   | 3 |
| Tia                  | 34.3416 | 76.9755 | 2 |    |   | 2 |
| Tiggarr              | 34.6356 | 77.6147 |   |    |   | 1 |
| Timisgam             | 34.3238 | 76.9886 |   |    |   | 3 |
| Tingdo               | 34.3584 | 76.2636 |   |    |   | 3 |
| Tirisha              | 34.7317 | 77.5641 | 1 |    |   | 2 |
| Tirit                | 34.5403 | 77.6447 | 1 |    |   | 1 |
| Tongsted             | 34.9848 | 77.3943 |   |    |   | 1 |
| Tonrian Thagan       | 33.5330 | 76.7916 |   |    |   | 3 |
| Toumel               | 34.4817 | 76.2800 |   |    |   | 2 |
| Trespore             | 34.4226 | 76.0454 |   |    |   | 3 |
| Tronjen (Trankuchan) | 34.3862 | 75.7417 |   |    |   | 2 |
| Tsazar               | 33.5874 | 77.0080 | 1 |    |   | 1 |
| Tsogsti              | 34.0993 | 77.3040 |   |    |   | 3 |
| Tsogstsalu           | 34.2683 | 78.7430 |   |    |   | 1 |
| Tukla                | 33.7455 | 77.9856 |   | 15 | 6 | 3 |

|                 |         |         |   |    |   |   |
|-----------------|---------|---------|---|----|---|---|
| Tukla phu       | 33.7583 | 78.0439 |   | 7  |   | 3 |
| Tunglung-Basgo  | 34.2390 | 77.2844 |   |    | 5 | 2 |
| Turtuk          | 34.8479 | 76.8257 |   |    |   | 1 |
| Tyakshi         | 34.8862 | 76.8043 |   |    |   | 2 |
| Udmaroo         | 34.7035 | 77.2693 |   |    |   | 2 |
| Ukdungle        | 32.6013 | 78.9677 |   |    |   | 1 |
| Ulley           | 34.3540 | 77.1313 | 3 |    | 4 | 1 |
| Umba            | 34.2906 | 75.9137 |   |    |   | 3 |
| Umla            | 34.2383 | 77.4010 |   |    |   | 2 |
| Upshi           | 33.8298 | 77.8150 |   |    |   | 1 |
| Upti Pipiting   | 33.4829 | 76.8896 |   |    |   | 1 |
| Urutse          | 34.0430 | 77.4014 |   |    | 1 | 2 |
| Wakhade         | 34.3689 | 76.4086 |   |    |   | 1 |
| Wanla           | 34.2491 | 76.8295 |   |    |   | 1 |
| Warisfistan     | 34.8734 | 77.1231 |   |    |   | 3 |
| Yal             | 33.2095 | 77.1504 |   |    |   | 3 |
| Yalboo          | 34.3877 | 75.7901 |   |    |   | 3 |
| Yangthang Tokpo | 34.3035 | 77.1216 | 2 |    | 2 | 2 |
| Yogmakharbu     | 34.4824 | 76.4996 |   |    |   | 1 |
| Yourbaltak      | 34.5756 | 76.1943 |   |    |   | 2 |
| Yugar-Lungnak   | 33.2664 | 77.1829 |   |    |   | 3 |
| Yulchung        | 33.9265 | 76.9125 |   |    |   | 3 |
| Yulgok          | 33.2299 | 77.0912 | 1 |    |   | 3 |
| Yuljuk          | 34.1568 | 75.9200 |   |    |   | 3 |
| Zangla          | 33.6568 | 76.9842 | 3 | 14 | 5 | 2 |
| Zangthang       | 33.2390 | 77.1217 | 1 |    |   | 3 |
| Zingchen        | 33.7921 | 76.8156 | 1 |    |   | 3 |

---
